# Supplementary material
Source: PubMed Central journal article supplement (PMC4351350)
Supplement: supp_kwu294_kwu294supp.pdf [file supp_kwu294_kwu294supp.pdf]

| Web Table 1. Prospective Cohort Studies of Vitamin Intake and All-cause Mortality |                                        |                         |                          |                                                |                                                                                                                     |                                                                                                                                                                                                    |
|-----------------------------------------------------------------------------------|----------------------------------------|-------------------------|--------------------------|------------------------------------------------|---------------------------------------------------------------------------------------------------------------------|----------------------------------------------------------------------------------------------------------------------------------------------------------------------------------------------------|
| Author Date                                                                       | Cohort Age of Subjects                 | # deaths/<br># subjects | Study dates<br>FU years  | Vitamins                                       | Risk estimate<br>(95% CI)                                                                                           | Statistically adjusted for                                                                                                                                                                         |
| Enstrom<br>1992 [1]                                                               | NHEFS<br>25-74 (mean = 53)             | 1809/<br>10,550         | 1971-1984<br>10 (median) | Total C index                                  | 0.70 (0.56-0.84)<br><br>0.85 (0.69-1.01)                                                                            | Age and sex<br><br>Age, sex, race, education, smoking, alcohol, exercise, cholesterol, history of serious disease, calories, fat, dietary vitamin A                                                |
| Stampfer<br>1993 [2]                                                              | NHS<br>34-59 (mean = 50)<br>women      | 974/<br>87,245          | 1980-1988<br>8           | Supplement E<br>MV                             | 0.87 (0.69-1.10)<br>1.10 (0.94-1.27)                                                                                | Age, time period, smoking, alcohol, exercise, Quetelet index, cholesterol, aspirin use, hypertension, diabetes, total energy intake, menopausal status, HRT, vitamin E supplements, MV supplements |
| Kim<br>1993 [3]                                                                   | NHEFS<br>25-74 (mean = 50)             | 2793/<br>10,758         | 1971-1987<br>13 (mean)   | MVM                                            | 1.02 (0.90-1.17) women<br>0.94 (0.82-1.06) men                                                                      | Age, race, education, marital status, smoking, alcohol, BMI, serious medical conditions, special diet                                                                                              |
| Pandey<br>1993 [4]                                                                | Western Electric Study<br>40-55<br>men | 552/<br>1556            | 1958-1983<br>24          | Dietary C<br><br>Dietary $\beta$ -<br>carotene | 0.93 medium vs. low<br>0.73 high vs. low<br>P=0.007 for trend<br>0.82 medium vs. low<br>0.80 high vs. low<br>P=0.01 | Age, smoking, alcohol, BMI, blood pressure, cholesterol, family history of CVD, dietary intake of energy, cholesterol, iron, saturated fats, and polyunsaturated fats                              |

|                      |                                               |                 |                 |                                                                                                                                                                      |                                                                                                                                                                                                                                                                                                                                                                                                                                                                                                                                |                                                                                                                                                                                                                              |
|----------------------|-----------------------------------------------|-----------------|-----------------|----------------------------------------------------------------------------------------------------------------------------------------------------------------------|--------------------------------------------------------------------------------------------------------------------------------------------------------------------------------------------------------------------------------------------------------------------------------------------------------------------------------------------------------------------------------------------------------------------------------------------------------------------------------------------------------------------------------|------------------------------------------------------------------------------------------------------------------------------------------------------------------------------------------------------------------------------|
| Sahyoun<br>1996 [5]  | Nutrition Status Survey<br>60-101 (mean = 73) | 262/<br>725     | 1981-1993<br>12 | Total C<br><br>Total E<br><br>Dietary $\beta$ -<br>carotene<br>Supplement C<br>Supplement E<br>MV<br><br>Total C<br><br>Total E<br><br>Dietary $\beta$ -<br>carotene | 0.87 (0.62-1.23) medium vs. low<br>0.53 (0.38-0.84) high vs. low<br>0.79 (0.59-1.07) medium vs. low<br>0.77 (0.51-1.18) high vs. low<br>0.78 (0.56-1.08) medium vs. low<br>0.68 (0.44-1.07) high vs. low<br>0.88 (0.49-1.59) vs. no C/E/MV<br>1.44 (0.67-3.09) vs. no C/E/MV<br>0.89 (0.64-1.23) vs. no C/E/MV<br><br>0.85 (0.60-1.20) medium vs. low<br>0.55 (0.34-0.88) high vs. low<br>0.77 (0.56-1.04) medium vs. low<br>0.83 (0.54-1.27) high vs. low<br>0.77 (0.55-1.07) medium vs. low<br>0.72 (0.46-1.13) high vs. low | Age and sex<br><br><br><br><br><br><br>Age, sex, cholesterol, disease<br>status, disabilities affecting<br>shopping                                                                                                          |
| Losonczy<br>1996 [6] | EPESE<br>65-105 (mean = 76)                   | 3490/<br>11,178 | 1984-1993       | Supplements:<br>E alone<br>C alone<br>E/C<br>MVM<br><br>E alone<br>C alone<br>E/C<br>MVM                                                                             | Vs. no supplement use<br>0.80 (0.57-1.11)<br>1.04 (0.89-1.23)<br>0.58 (0.42-0.79)<br>1.04 (0.93-1.18)<br><br>0.87 (0.63-1.22)<br>1.09 (0.93-1.28)<br>0.63 (0.46-0.86)<br>1.03 (0.91-1.16)                                                                                                                                                                                                                                                                                                                                      | Age, sex and other vitamins<br><br><br><br>Age, sex, race, education,<br>smoking, alcohol, BMI, aspirin<br>use, disease history<br>(hypertension, coronary heart<br>disease, stroke, diabetes,<br>cancer) and other vitamins |

|                       |                                                |                      |                |                                                                                            |                                                                                                                                                                                                                                                                                                                           |                                                                                                                                                                                                                                                                                                               |
|-----------------------|------------------------------------------------|----------------------|----------------|--------------------------------------------------------------------------------------------|---------------------------------------------------------------------------------------------------------------------------------------------------------------------------------------------------------------------------------------------------------------------------------------------------------------------------|---------------------------------------------------------------------------------------------------------------------------------------------------------------------------------------------------------------------------------------------------------------------------------------------------------------|
| Todd<br>1999 [7]      | Scottish Heart Health Study<br>40-59 (mean=49) | 350/<br>7869         | 1984-1993      | Dietary:<br>C<br><br>E<br><br>$\beta$ -carotene<br><br>C<br><br>E<br><br>$\beta$ -carotene | Q4 vs. Q1<br>0.58 (0.32-1.03) women<br>0.57 (0.40-0.82) men<br>0.92 (0.53-1.60) women<br>0.73 (0.52-1.02) men<br>0.84 (0.50-1.41) women<br>0.76 (0.54-1.06) men<br><br>0.88 (0.47-1.63) women<br>0.68 (0.46-1.01) men<br>1.28 (0.72-2.28) women<br>0.91 (0.63-1.31) men<br>1.07 (0.63-1.82) women<br>0.87 (0.61-1.23) men | Age<br><br><br><br>Age, alcohol, activity, BMI,<br>blood pressure, cholesterol,<br>triglycerides, HDL-cholesterol,<br>diabetes, energy, personality<br>score, fibrinogen, carbon<br>monoxide                                                                                                                  |
| Watkins<br>2000 [8]   | CPS II<br>$\geq 30$                            | 14,753/<br>1,063,023 | 1982-1989<br>7 | Supplements:<br>MVM<br><br>A, C or E<br><br>MVM<br><br>A, C or E                           | Vs. no supplement use<br>0.99 women<br>1.02 men<br>0.87 women<br>0.89 men<br><br>1.02 (1.00-1.05) women<br>1.05 (1.02-1.08) men<br>0.95 (0.92-0.98) women<br>0.98 (0.96-1.01) men                                                                                                                                         | Age<br><br><br><br>Age, race, education, marital<br>status, employment, smoking,<br>alcohol, coffee, exercise, BMI,<br>aspirin use, diuretic use,<br>estrogen use (women),<br>disease history (hypertension,<br>heart disease, stroke,<br>diabetes, cancer, cirrhosis,<br>kidney disease), vegetable<br>index |
| Genkinger<br>2004 [9] | Odyssey Cohort<br>30-93 (mean=56)              | 910/<br>6151         | 1989-2002      | Dietary:<br>C<br>E<br>$\beta$ -carotene<br><br>C<br>E<br>$\beta$ -carotene                 | Q5 vs. Q1<br>0.88 (0.72-1.07)<br>0.94 (0.77-1.14)<br>0.81 (0.66-1.00)<br><br>0.95 (0.77-1.17)<br>0.98 (0.80-1.19)<br>0.81 (0.66-1.00)                                                                                                                                                                                     | Age and energy<br><br><br>Age, smoking, BMI,<br>cholesterol, energy                                                                                                                                                                                                                                           |

|                         |                                          |                    |                         |                                                  |                                                                                                                                                                                                     |                                                                                                                                                                                                                                           |
|-------------------------|------------------------------------------|--------------------|-------------------------|--------------------------------------------------|-----------------------------------------------------------------------------------------------------------------------------------------------------------------------------------------------------|-------------------------------------------------------------------------------------------------------------------------------------------------------------------------------------------------------------------------------------------|
| Iso<br>2007 [10]        | JACC<br>40-79                            | 16,678/<br>105,629 | ?-2003                  | MVM<br><br>Supplement C<br><br>Supplement E      | 0.98 (0.90-1.08) women<br>1.02 (0.95-1.10) men<br>0.93 (0.82-1.04) women<br>1.06 (0.95-1.18) men<br>0.92 (0.83-1.03) women<br>0.92 (0.81-1.04) men                                                  | Age and region                                                                                                                                                                                                                            |
| Hayden<br>2007 [11]     | Cache County Study<br>65+ (mean=75)      | 1129/<br>4416      | 1995-2002<br>7          | Supplement E                                     | 0.93 (0.74-1.15)<br><br>1.00 (0.80-1.25)<br><br>Note increased risk in those<br>with preexisting cardiac disease                                                                                    | Age and sex<br><br>Age, sex, disease history<br>(myocardial infraction, stroke,<br>diabetes, coronary artery<br>bypass graft surgery), nitrates,<br>warfarin, diuretics                                                                   |
| Agudo<br>2007 [12]      | EPIC-Spain<br>30-69 (mean=49)            | 562/<br>41,358     | 1992-2002<br>6.5 (mean) | Dietary:<br>C<br>E<br>Provitamin A<br>β-carotene | Q4 vs. Q1<br>0.74 (0.58-0.94)<br>0.83 (0.64-1.08)<br>0.68 (0.53-0.87)<br>0.74 (0.58-0.95)                                                                                                           | Age, sex, education, smoking,<br>alcohol, physical activity, BMI,<br>total energy                                                                                                                                                         |
| Messerer<br>2008 [13]   | Swedish cohort<br>45-79 (mean=59)<br>men | 3403/<br>38,944    | 1997-2005<br>8          | Regular<br>supplement<br>use                     | 1.00 (0.91-1.09)<br><br>1.04 (0.95-1.13)                                                                                                                                                            | Age<br><br>Age, education, marital status,<br>smoking, physical activity, BMI,<br>cholesterol, hypertension,<br>diabetes, self-perceived<br>health, and food score                                                                        |
| Brzozowska<br>2008 [14] | SENECA Study<br>70-75 (mean = 73)        | 697/<br>1900       | 1988-1999<br>10         | Supplements:<br>C<br><br>A<br><br>E              | Vs. no supplement use<br>1.55 (0.97-2.46) smoker<br>0.71 (0.45-1.13) non-smoker<br>1.22 (0.73-2.03) smoker<br>0.82 (0.50-1.34) non-smoker<br>1.31 (0.78-2.21) smoker<br>0.97 (0.62-1.51) non-smoker | Age, sex, education, latitude,<br>alcohol, physical activity, BMI,<br>chronic diseases,<br>Mediterranean diet score                                                                                                                       |
| Neuhauser<br>2009 [15]  | WHI<br>50-79<br>women                    | 9865/<br>161,806   | 1993-2005<br>8 (median) | MVM                                              | 1.02 (0.97-1.07)                                                                                                                                                                                    | Age, ethnicity, education,<br>geographic region, smoking,<br>alcohol, physical activity, BMI,<br>menopausal status, HRT,<br>general health, fruit and<br>vegetable intake, energy from<br>fat, single supplements of<br>C/E/calcium/other |

|                        |                                                                   |                   |                        |                                                                                                        |                                                                                                                                                                                                                                   |                                                                                                                                                                                                                                                                                                                                                                     |
|------------------------|-------------------------------------------------------------------|-------------------|------------------------|--------------------------------------------------------------------------------------------------------|-----------------------------------------------------------------------------------------------------------------------------------------------------------------------------------------------------------------------------------|---------------------------------------------------------------------------------------------------------------------------------------------------------------------------------------------------------------------------------------------------------------------------------------------------------------------------------------------------------------------|
| Pocobelli<br>2009 [16] | VITAL Study<br>50-76                                              | 3577/<br>77,673   | 2000-2006<br>5 (mean)  | Supplements:<br>MV<br>C<br>E<br><br>MV<br>C<br>E                                                       | 10-yr average frequency (MV) or<br>10-yr average dose, T3 vs. 0<br>0.87 (0.81-0.91)<br>0.73 (0.66-0.80)<br>0.72 (0.69-0.79)<br><br>1.00 (0.92-1.09)<br>0.89 (0.81-0.98)<br>0.89 (0.81-0.98)                                       | Age and sex<br><br>Age, sex, ethnicity, education,<br>marital status, smoking,<br>alcohol, physical activity, BMI,<br>aspirin use, NSAID use,<br>cholesterol meds, HRT, PSA<br>screening, mammogram,<br>sigmoidoscopy, self-rated<br>health, morbidity score,<br>parents' ages at death, fruit<br>and vegetable intake, calories<br>from saturated fats& trans-fats |
| Dietrich<br>2009 [17]  | Framingham Heart Study &<br>Framingham Offspring Study<br>Mean=59 | 611/<br>4270      | 1986-2005<br>10        | Supplement E                                                                                           | 1.01 (0.78-1.30)                                                                                                                                                                                                                  | Age, sex, smoking, BMI, blood<br>pressure, blood pressure<br>treatment, cholesterol,<br>diabetes, cardiovascular<br>disease                                                                                                                                                                                                                                         |
| Mursu<br>2011 [18]     | IWHS<br>55-69 (mean=62)<br>women                                  | 15,594/<br>38,722 | 1986-2008<br>19 (mean) | Supplements:<br>MVM<br>A<br>$\beta$ -carotene<br>C<br>E<br><br>MVM<br>A<br>$\beta$ -carotene<br>C<br>E | Vs. no supplement use<br>1.02 (0.99-1.05)<br>0.99 (0.93-1.05)<br>1.00 (0.85-1.17)<br>0.96 (0.96-0.99)<br>0.94 (0.90-0.99)<br><br>1.06 (1.02-1.10)<br>1.06 (0.99-1.13)<br>1.10 (0.93-1.30)<br>1.01 (0.97-1.05)<br>1.01 (0.96-1.05) | Age and energy<br><br>Age, education, residence,<br>smoking, alcohol, physical<br>activity, BMI, waist-to-hip ratio,<br>HRT, hypertension, diabetes,<br>and intakes of total energy,<br>saturated fat, whole grains,<br>fruits, and vegetables                                                                                                                      |

|                      |                                                       |                    |                          |                                                                                        |                                                                                                                                                                                                              |                                                                                                                                                                                                            |
|----------------------|-------------------------------------------------------|--------------------|--------------------------|----------------------------------------------------------------------------------------|--------------------------------------------------------------------------------------------------------------------------------------------------------------------------------------------------------------|------------------------------------------------------------------------------------------------------------------------------------------------------------------------------------------------------------|
| Park<br>2011 [19]    | MEC Study<br>45-75 (mean = 60)                        | 28,851/<br>182,099 | 1993-2005<br>11 (mean)   | MVM                                                                                    | 0.96 (0.85-1.09) women<br>1.07 (0.96-1.19) men                                                                                                                                                               | Age, ethnicity, education,<br>smoking, alcohol, physical<br>activity, BMI, HRT, preexisting<br>illness, menopausal status,<br>fruit intake, vegetable intake,<br>energy from fat, single<br>supplement use |
| Li<br>2012 [20]      | EPIC-Heidelberg<br>35-64 (mean=50)                    | 1101/<br>23,943    | 1994-2006<br>11 (mean)   | Supplements:<br>MVM<br>Anti-oxidant<br>Other                                           | Vs. no supplement use<br>0.85 (0.63-1.14)<br>0.58 (0.38-0.88)<br>0.97 (0.84-1.11)                                                                                                                            | Age, sex, education, smoking,<br>physical activity, BMI, waist-to-<br>hip ratio, NSAID use, intakes<br>of total energy and meat                                                                            |
| Roswall<br>2012 [21] | Diet, Cancer and Health<br>Study<br>50-64 (median=56) | 6767/<br>55,453    | 1993-2010<br>13.8 (mean) | Dietary:<br>C<br>E<br>$\beta$ -carotene<br>Supplements:<br>C<br>E<br>$\beta$ -carotene | per 100 mg/day for C, 10 mg/day<br>for E, 5000 $\mu$ g/day for $\beta$ -<br>carotene<br>1.05 (0.99-1.11)<br>0.90 (0.80-1.02)<br>0.98 (0.95-1.01)<br>1.00 (0.99-1.01)<br>1.00 (1.00-1.01)<br>1.02 (0.91-1.15) | Education, smoking, alcohol,<br>physical activity, BMI, waist<br>circumference, and dietary<br>intake for supplements and<br>supplemental intake for dietary<br>intake                                     |

Abbreviations: BMI, body mass index; CPS, Cancer Prevention Study; CVD, cardiovascular disease; EPES, Established Populations for Epidemiologic Studies of the Elderly; EPIC, European Prospective Investigation into Cancer and Nutrition; HRT, hormone replacement therapy; IWHS, Iowa Women's Health Study; JACC, Japan Collaborative Cohort study; MEC, Multiethnic Cohort; MV, multivitamin; MVM, multivitamin-multimineral; NHEFS, National Health and Nutrition Examination Survey I Epidemiologic Follow-up Study; NHS, Nurses' Health Study; NSAID, non-steroidal anti-inflammatory drug; SENECA, Survey in Europe on Nutrition and the Elderly, a Concerted Action; VITAL, Vitamins and Lifestyle; WHI, Women's Health Initiative

1. Enstrom JE, Kanim LE, Klein MA. Vitamin C intake and mortality among a sample of the United States population. *Epidemiology* 1992; 3(3):194-202.
2. Stampfer MJ, Hennekens CH, Manson JE, et al. Vitamin E consumption and the risk of coronary disease in women. *N Engl J Med* 1993;328(20):1444-1449.
3. Kim I, Williamson DF, Byers T, Koplan JP. Vitamin and mineral supplement use and mortality in a US cohort. *Am J Public Health* 1993;83(4):546-550.
4. Pandey DK, Shekelle R, Selwyn BJ, Tangney C, Stamler J. Dietary vitamin C and  $\beta$ -carotene and risk of death in middle-aged men. The Western Electric Study. *Am J Epidemiol* 1995;142(12):1269-1278.
5. Sahyoun NR, Jacques PF, Russell RM. Carotenoids, vitamins C and E, and mortality in an elderly population. *Am J Epidemiol* 1996;144(5):501-511.
6. Losonczy KG, Harris TB, Havlik RJ. Vitamin E and vitamin C supplement use and risk of all-cause and coronary heart disease mortality in older persons: the Established Populations for Epidemiologic Studies of the Elderly. *Am J Clin Nutr* 1996;64(2):190-196.
7. Todd S, Woodward M, Turnstall-Pedoe H, Bolton-Smith C. Dietary antioxidant vitamins and fiber in the etiology of cardiovascular and all-causes mortality: results from the Scottish Heart Health Study. *Am J Epidemiol* 1999;150(10):1073-1080.
8. Watkins ML, Erickson JD, Thun MJ, Mulinaire J, Heath CW Jr. Multivitamin use and mortality in a large prospective study. *Am J Epidemiol* 2000;152(2):149-162.
9. Genkinger JM, Platz EA, Hoffman SC, Comstock GW, Helzlsouer KJ. Fruit, vegetable, and antioxidant intake and all-cause, cancer, and cardiovascular disease mortality in a community-dwelling population in Washington County, Maryland. *Am J Epidemiol* 2004; 160(2) 1223-1233.
10. Iso H, Kubota Y. Nutrition and disease in the Japan Collaborative Cohort Study for

- Evaluation of Cancer (JACC). *Asian Pacific J Cancer Prev* 2007; 8 Suppl: 35-40.
11. Hayden KM, Welsh-Bohmer KA, Wengreen HJ, et al. Risk of mortality with vitamin E supplements: The Cache County Study. *Am J Med* 2007;120(2):180-184.
  12. Agudo A, Cabrera L, Amiano P, et al. Fruit and vegetable intakes, dietary antioxidant nutrients, and total mortality in Spanish adults: findings from the Spanish cohort of the European Prospective Investigation into Cancer and Nutrition (EPIC-Spain). *Am J Clin Nutr* 2007;85(6):1634-1642.
  13. Messerer M, Håkansson, Wolk A, Åkesson A. Dietary supplement use and mortality in a Swedish cohort. *Brit J Nutr* 2008;99(3):626-631.
  14. Brzozowska A, Kaluza J, Knoop KTB, de Groot LCPGM. Supplement use and mortality: the SENECA study. *Eur J Nutr* 2008;47(3):131-137.
  15. Neuhauser ML, Wasserheil-Smoller S, Thomson C, et al. Multivitamin use and risk of cancer and cardiovascular disease in the Women's Health Initiative Cohorts. *Arch Intern Med* 2009;169(3):294-304.
  16. Pocobelli G, Peters U, Kristal AR, White E. Use of supplements of multivitamins, vitamin C, and vitamin E in relation to mortality. *Am J Epidemiol* 2009; 170(4):472-483.
  17. Dietrich M, Jacques PF, Pencina MJ, et al. Vitamin E supplement use and incidence of cardiovascular disease and all-cause mortality in the Framingham Heart Study: does the underlying health status play a role? *Atherosclerosis* 2009;205(2):549-543.
  18. Mursu J, Robien K, Harnack LJ, Park K, Jacobs DR Jr. Dietary supplements and mortality rate in older women. *Arch Intern Med* 2011;171(18):1625-1633.
  19. Park S-Y, Murphy SP, Wilkens LR, Henderson BE, Kolonel LN. Multivitamin use and the risk of mortality and cancer incidence. The Multiethnic Cohort Study. *Am J*



Epidemiol 2011;173(8):906-914.

20. Li K, Kaaks R, Linselsen J, Rohrmann S. Vitamin/mineral supplementation and cancer, cardiovascular, and all-cause mortality in a German prospective cohort (EPIC-Heidelberg). *Eur J Nutr* 2012;51(4):407-413.
21. Roswall N, Olsen A, Christensen J, Hansen L, et al. Micronutrient intake in relation to all-cause mortality in a prospective Danish cohort. *Food & Nutrition Research* 2012;56:5466.
